# Supplementary material
Source: Springer Nature journal article supplement (https://www.springermedizin.de/resource/supplementary/12913_2009_1329_MOESM2_ESM.pdf/9527888)

Legend:  Gangrene  Osteomyelitis  Ulcer  Foot Cellulitis  Toe Cellulitis  Paronychia  Other

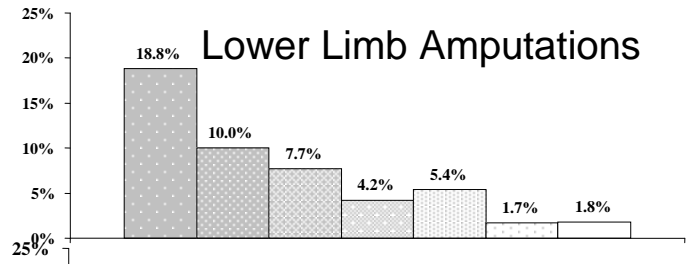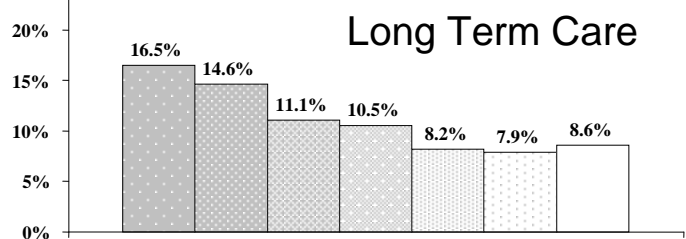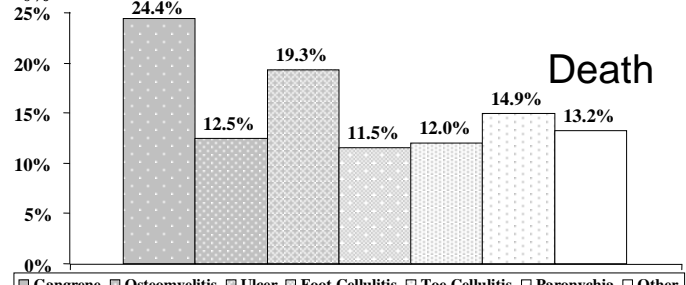

Supplement: MOESM2 [file 9527888]
